# Supplementary material for: In situ synthesis of MoS2/graphene nanosheets as free-standing and flexible electrode paper for high-efficiency hydrogen evolution reaction
Source: Royal Society of Chemistry journal article supplement (doi:10.1039/c8ra01226a), 2018-01-01
Supplement: c8ra01226a1.pdf [file c8ra01226a1.pdf]

## Supporting information:

### ***In-situ* Synthesis of MoS<sub>2</sub>/graphene Nanosheets as Free-standing and Flexible Electrode Paper for High-Efficiency Hydrogen Evolution Reaction**

Xianghui Zhang <sup>1\*</sup>, Mingguang Zhang <sup>1</sup>, Yiqun Tian <sup>1</sup>, Jing You <sup>1</sup>, Congxing Yang <sup>2</sup>, Jun Su <sup>2</sup>, Yuebin Li <sup>1</sup>, Yihua Gao<sup>2</sup>, and Haoshuang Gu <sup>1\*</sup>

1. Hubei Collaborative Innovation Center for Advanced Organic Chemical Materials, Hubei Key Laboratory of Ferro & Piezoelectric Materials and Devices, Faculty of Physics & Electronic Sciences, Hubei University, Wuhan, 430062, P.R. China.
2. Center for Nanoscale Characterization and Devices, School of Physics and Wuhan National Laboratory for Optoelectronics, Huazhong University of Science and Technology, Luoyu Road 1037, Wuhan 430074, P.R. China.

Email : xhzhang@hubu.edu.cn, guhsh@hubu.edu.cn

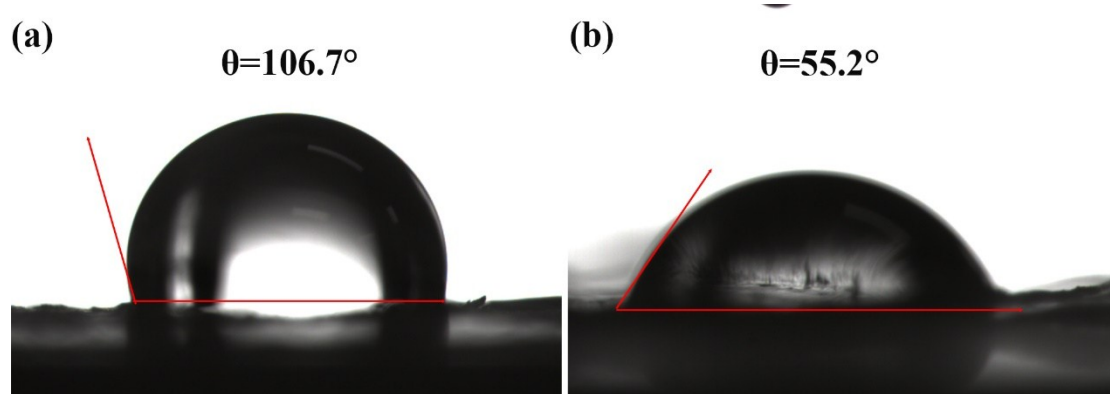

Figure S1 Contact angle measurement of MoS<sub>2</sub>/graphene hybrid film (a) before and (b) after heat-treated at 700 °C for 2 hours in Ar flow.

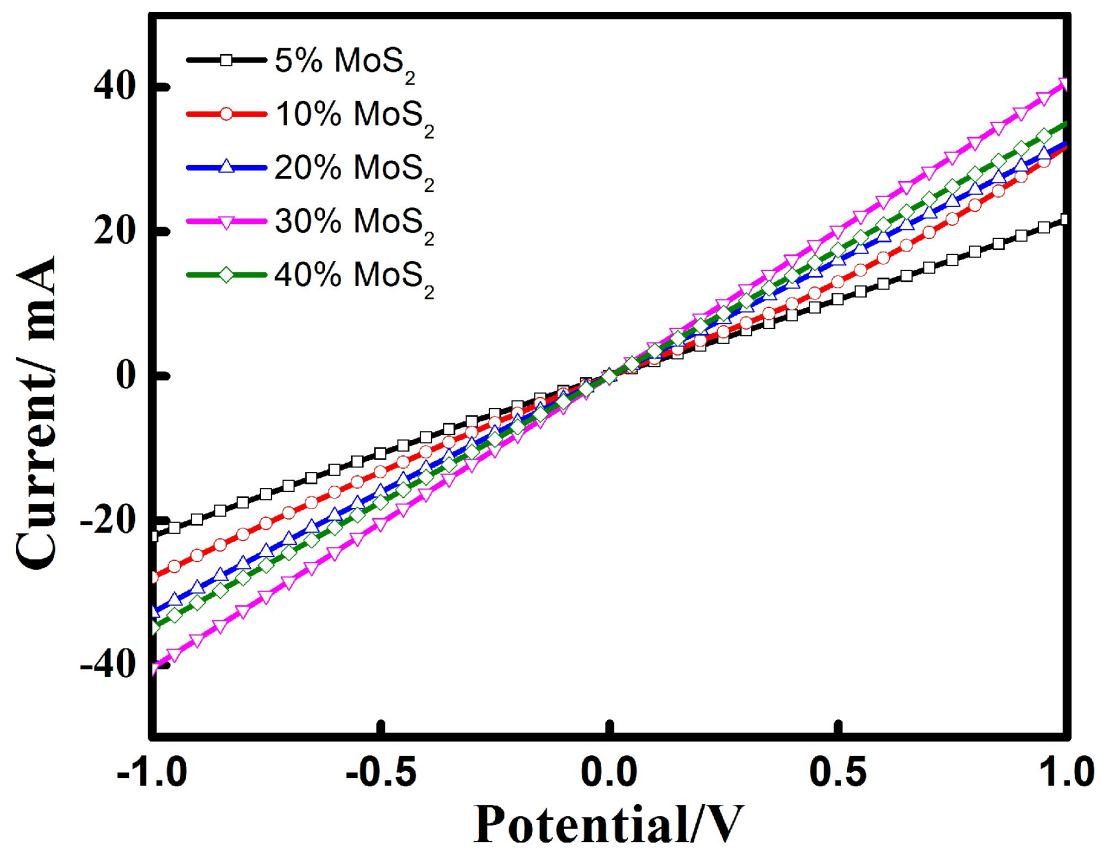

Figure S2. The I-V curve measurement of the MoS<sub>2</sub>/graphene hybrid thin films with various loading rate from 5% to 40%.

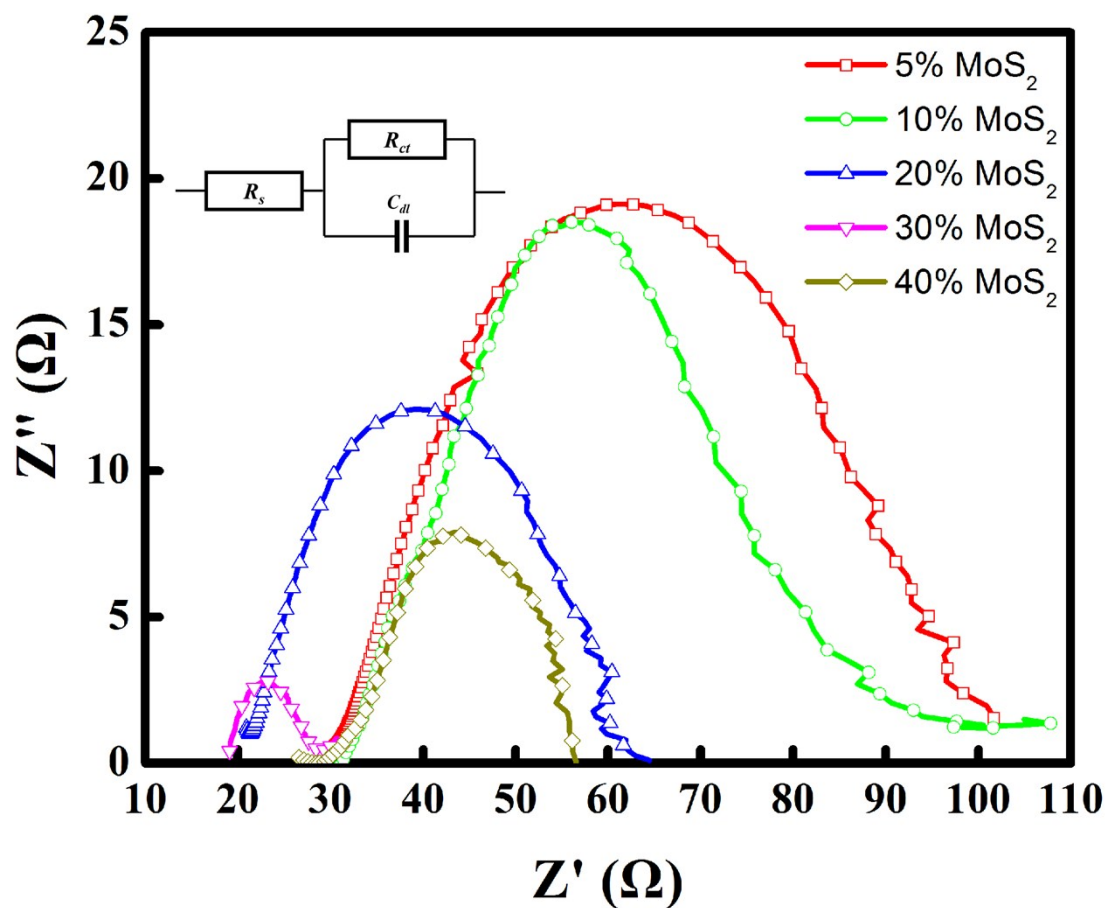

Figure S3. The Nyquist plots of MoS<sub>2</sub>/graphene hybrid thin films with various loading rate collected from 10<sup>5</sup> to 0.1 Hz with an amplitude of 10 mV at the open-circuit voltage.

Table 1. Comparison of catalytic parameters of various loading rate MoS<sub>2</sub> catalysts and commercial Pt-C catalyst.

| Catalyst             | Onset overpotentials (mV vs RHE) | Tafel slopes (mV/dec) | Exchange current density ( $\mu\text{A}/\text{cm}^2$ ) | $\eta$ (mV) @j=10 mA/cm <sup>2</sup> |
|----------------------|----------------------------------|-----------------------|--------------------------------------------------------|--------------------------------------|
| 5% MoS <sub>2</sub>  | 263.7                            | 156.7                 | 10.3                                                   | 490.2                                |
| 10% MoS <sub>2</sub> | 261.3                            | 156.1                 | 18.6                                                   | 430.3                                |
| 20% MoS <sub>2</sub> | 212.1                            | 142.6                 | 33.7                                                   | 355.5                                |
| 30% MoS <sub>2</sub> | 94.2                             | 140.1                 | 168.4                                                  | 238.5                                |
| 40% MoS <sub>2</sub> | 221.6                            | 147.8                 | 27.5                                                   | 377.2                                |
| Pt-C                 | 23.9                             | 33.9                  | 51.6                                                   | 91.2                                 |

Table 2. Electrochemical Impedance Spectroscopy (EIS) parameters of different loading rate MoS<sub>2</sub> catalysts

| Catalyst             | Double-layer capacitance ( $\mu\text{F}$ ) | Charge-transfer Resistance ( $R_{ct}/\Omega$ ) | Series Resistance ( $R_s/\Omega$ ) |
|----------------------|--------------------------------------------|------------------------------------------------|------------------------------------|
| 5% MoS <sub>2</sub>  | 379.8                                      | 83.5                                           | 6.2                                |
| 10% MoS <sub>2</sub> | 216.7                                      | 36.6                                           | 31.6                               |
| 20% MoS <sub>2</sub> | 108.5                                      | 35.5                                           | 26.5                               |
| 30% MoS <sub>2</sub> | 92.2                                       | 3.8                                            | 36.6                               |
| 40% MoS <sub>2</sub> | 85.6                                       | 14.5                                           | 30.6                               |
